# Supplementary material for: Anticoagulant Properties of a Green Algal Rhamnan-type Sulfated Polysaccharide and Its Low-molecular-weight Fragments Prepared by Mild Acid Degradation
Source: MDPI journal article supplement (doi:10.3390/md16110445), 2018-11-12
Supplement: s1 [file s1]

## SUPPLEMENTARY FIGURE LEGENDS

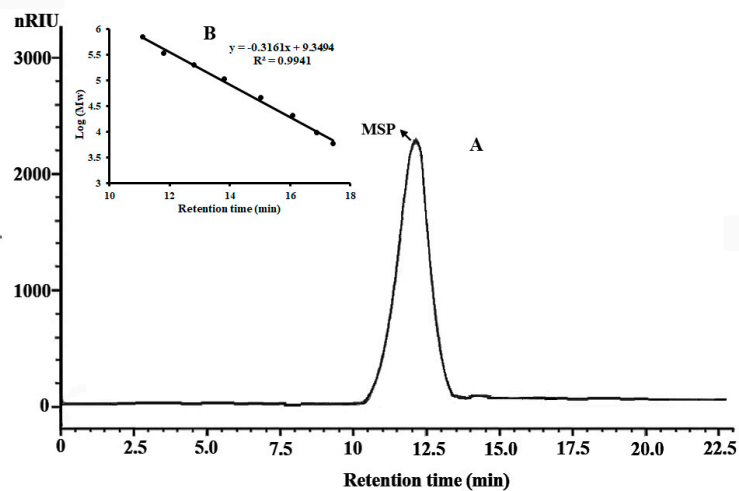

**Figure S1.** IR spectra of MSP and MSP-Fs.

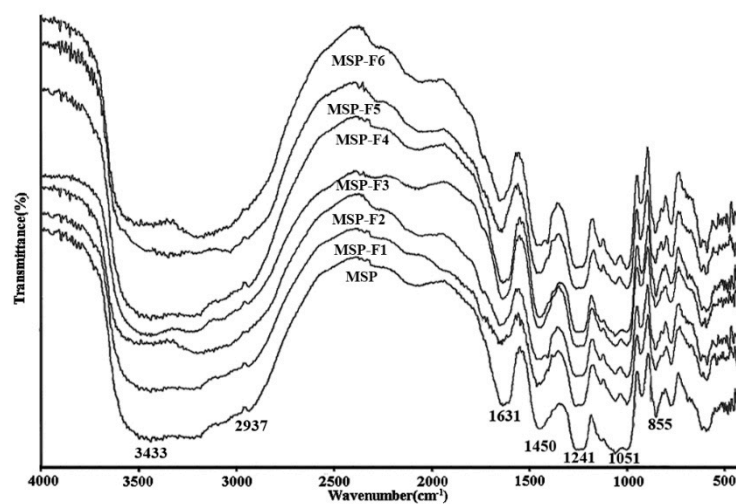

**Figure S2.** HPGPC chromatogram of MSP and the standard curve of molecular weight. (A)

HPGPC chromatogram of MSP; (B) the standard curve of molecular weight.

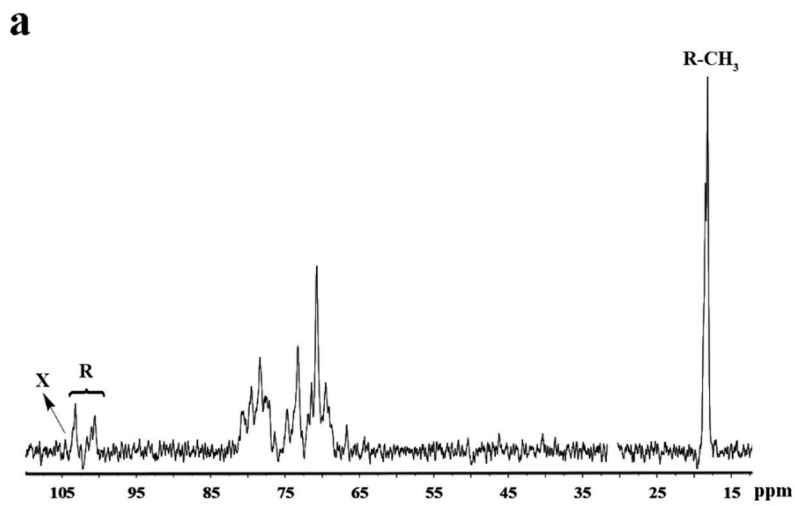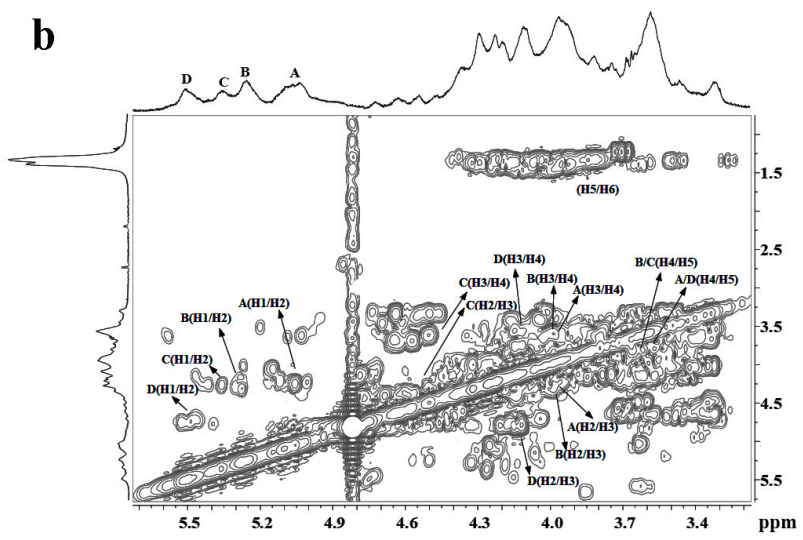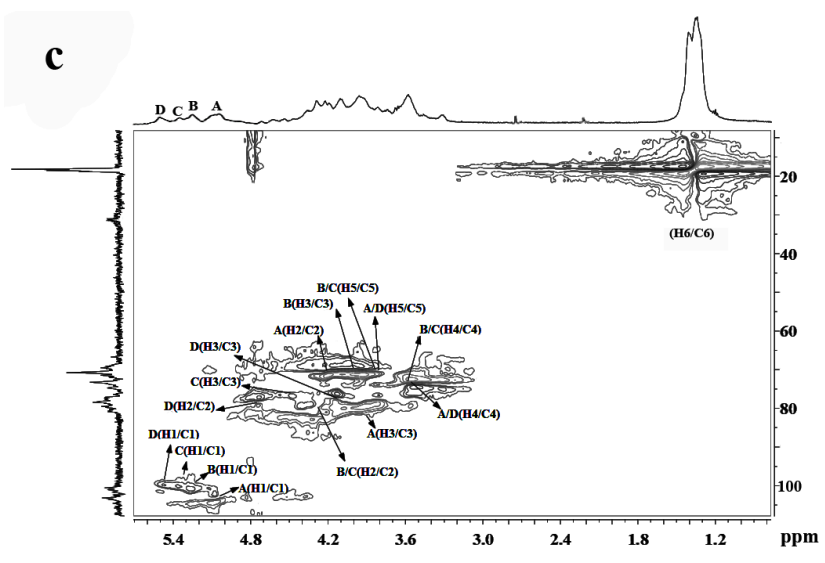

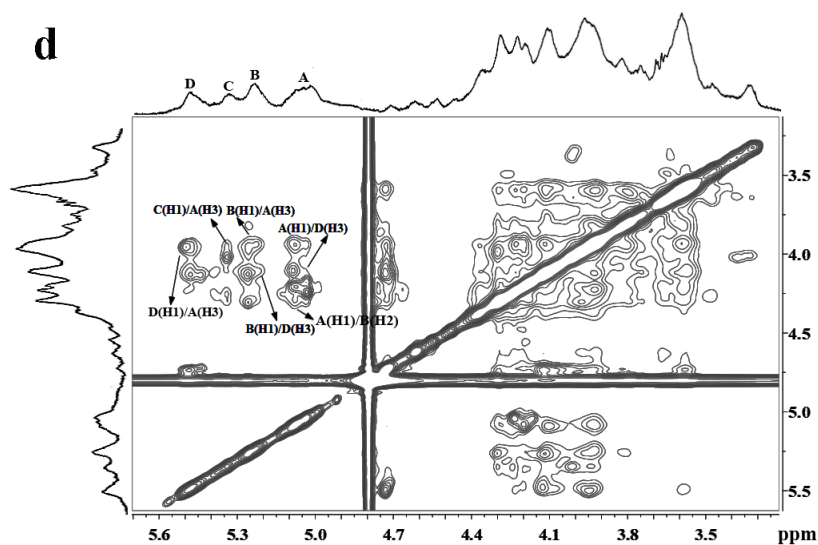

**Figure S3.**  $^{13}\text{C}$  NMR and 2D NMR spectra of MSP. Spectra were performed on an Agilent DD2 500M NMR spectrometer. Chemical shifts are referenced to internal acetone at 2.225 ppm for  $^1\text{H}$  and 31.07 ppm for  $^{13}\text{C}$ . (a)  $^{13}\text{C}$  NMR spectrum; (b)  $^1\text{H}$ - $^1\text{H}$  COSY spectrum; (c)  $^1\text{H}$ - $^{13}\text{C}$  HSQC spectrum; (d)  $^1\text{H}$ - $^1\text{H}$  NOESY spectrum. A–D correspond to  $\rightarrow 3)$ - $\alpha$ -L-Rhap-(1 $\rightarrow$ ,  $\rightarrow 2)$ - $\alpha$ -L-Rhap-(1 $\rightarrow$ ,  $\rightarrow 2)$ - $\alpha$ -L-Rhap(3SO $_4$ )-(1 $\rightarrow$  and  $\rightarrow 3)$ - $\alpha$ -L-Rhap(2SO $_4$ )-(1 $\rightarrow$ , respectively. Rhap: rhamnopyranose; R: rhamnose; X: xylose.

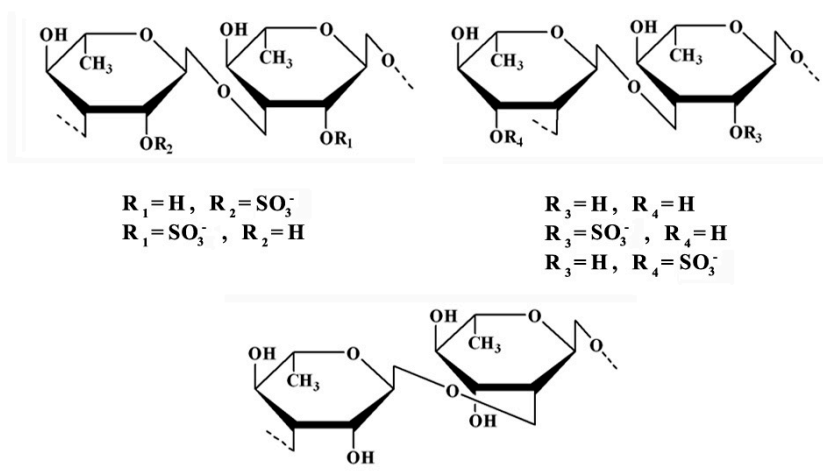

**Figure S4.** Structures of the main repeating disaccharides of MSP.
